# Supplementary material
Source: PubMed Central journal article supplement (PMC4792485)
Supplement: koni-04-11-1047585-s001.pdf [file koni-04-11-1047585-s001.pdf]

## **Supporting Information for**

# **Spatial separation of the processing and MHC class I loading compartments for cross-presentation of the tumor-associated antigen HER2/*neu* by dendritic cells**

Renato B. Baleeiro,<sup>1</sup> René Rietscher,<sup>2</sup> Andrea Diedrich,<sup>3</sup> Justyna A. Czaplewska,<sup>4,5</sup>  
Claus-Michael Lehr,<sup>2,6</sup> Regina Scherließ,<sup>3</sup> Andrea Hanefeld,<sup>7</sup> Michael Gottschaldt,  
<sup>4,5</sup> Peter Walden<sup>1§</sup>

<sup>1</sup> Department of Dermatology, Venerology and Allergy, Charité – Universitätsmedizin Berlin, Berlin, Germany;

<sup>2</sup> Helmholtz Institute for Pharmaceutical Research Saarland (HIPS), Helmholtz Centre for Infection Research (HZI), Saarland University, Saarbrücken, Germany;

<sup>3</sup> Department of Pharmaceutics and Biopharmaceutics – Kiel University, Kiel, Germany;

<sup>4</sup> Laboratory of Organic and Macromolecular Chemistry (IOMC), Friedrich Schiller University Jena, Jena, Germany;

<sup>5</sup> Jena Center for Soft Matter (JCSM), Friedrich Schiller University Jena, Jena, Germany;

<sup>6</sup> Biopharmaceutics and Pharmaceutical Technology, Saarland University, Saarbrücken, Germany;

<sup>7</sup> Merck KGaA, Darmstadt, Germany

<sup>§</sup> Corresponding Author: peter.walden@charite.de

Supplementary Figures

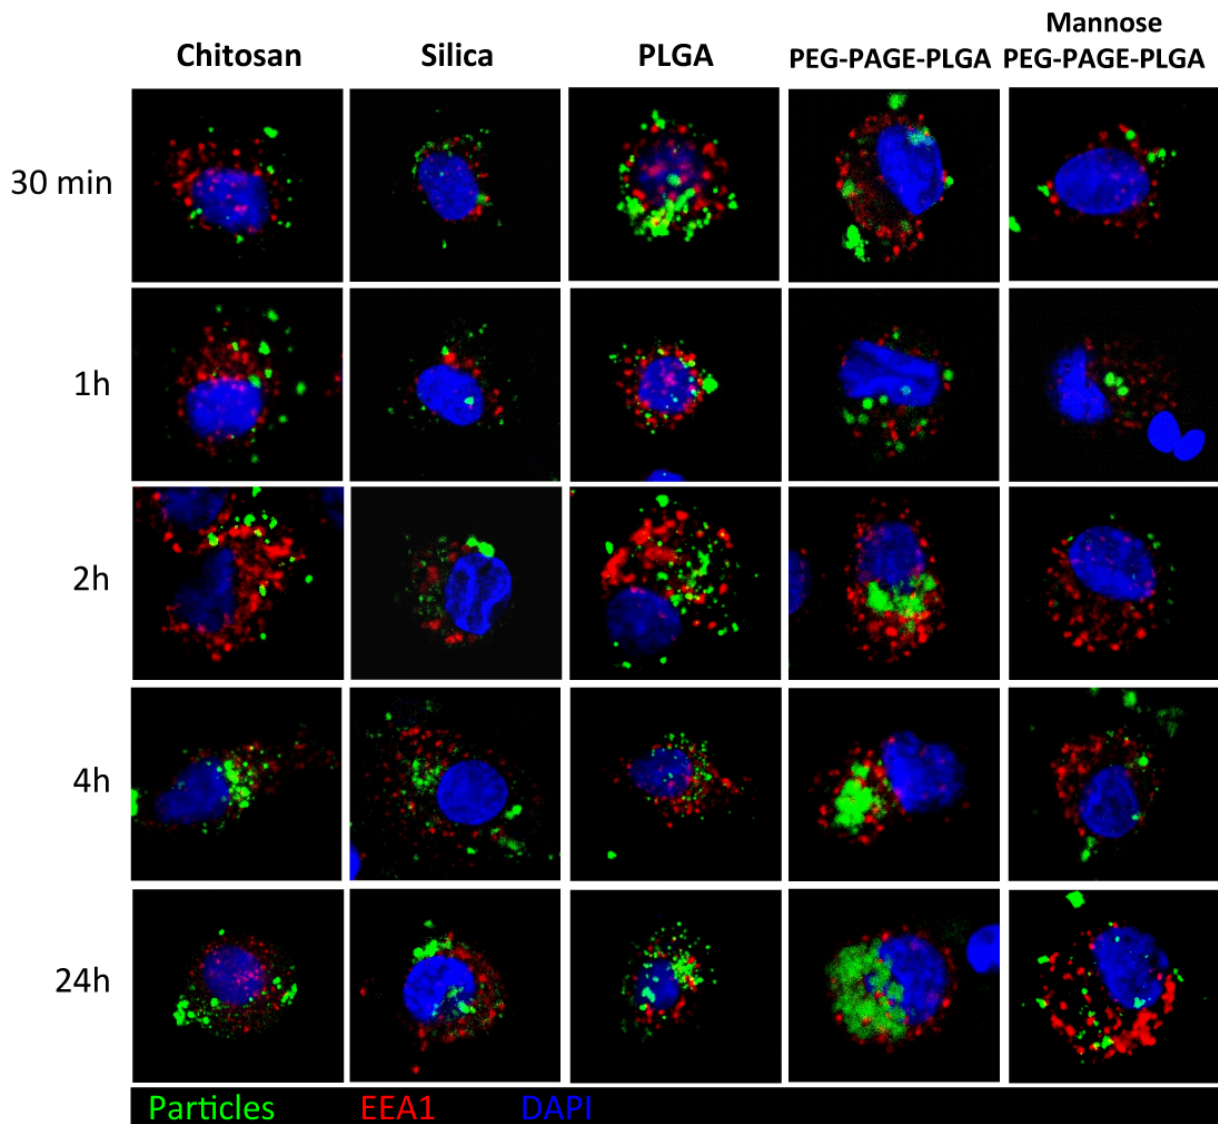

**Supplementary Figure 1**

**Routing kinetics of NPs into early endosomes.**

Confocal images showing DCs loaded with the indicated fluorochrome-labeled NPs (green) and stained with EEA1 (red; for early endosomes labeling), and DAPI (blue; for nuclei labeling). Confocal micrographs were taken with a 63x oil objective lens.

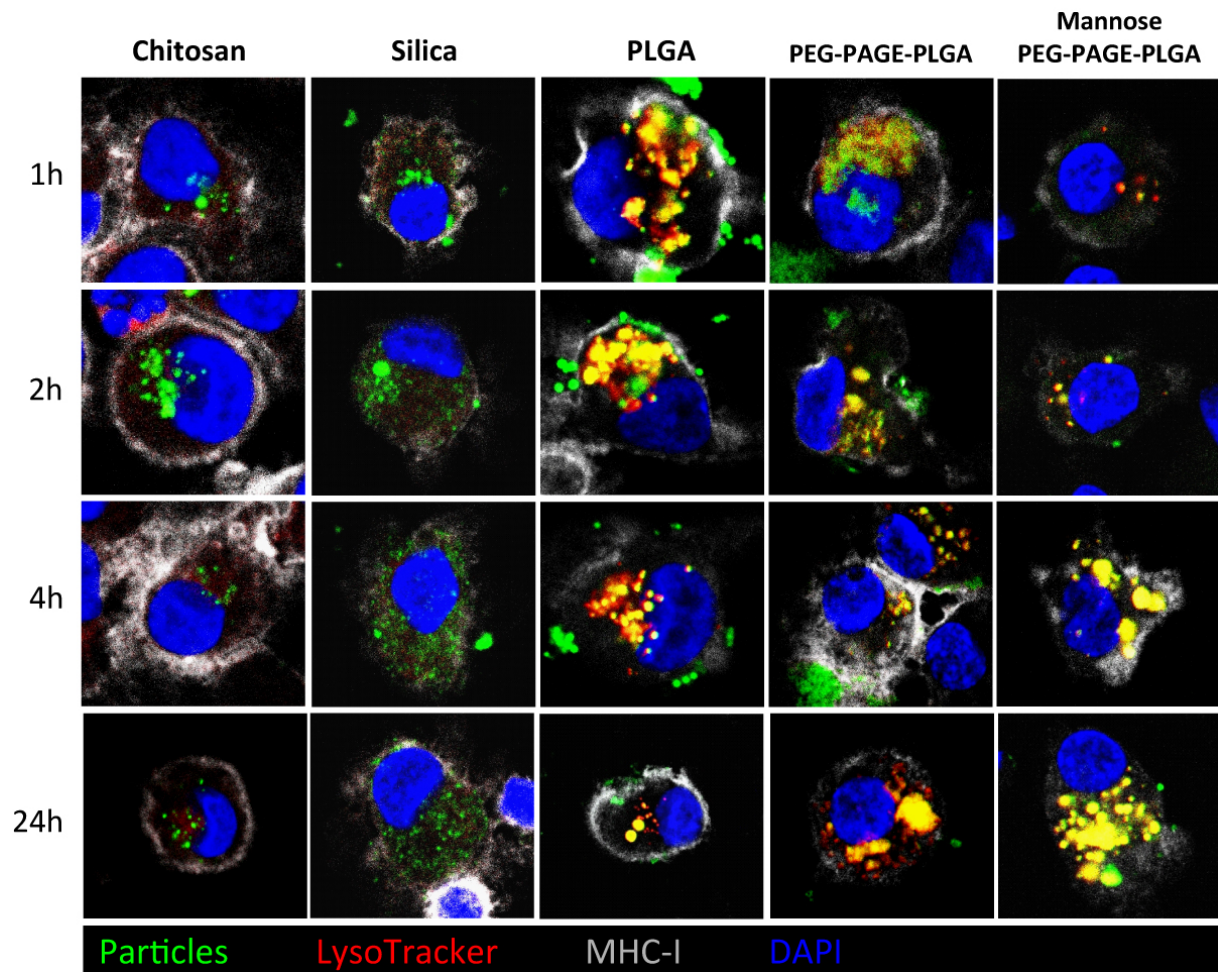

**Supplementary Figure 2**

**Kinetics of routing NPs into acidic compartments.**

Confocal images depicting DCs loaded with fluorochrome-labeled NPs (green) and stained with LysoTracker Red DND-99 (red; for late/acidic endosomes), Alexa fluor 647-labeled MHC-I (gray; for cell membrane) and DAPI (blue; for nuclei). NPs inside acidic compartments appear in yellow. Confocal micrographs were taken with a 63x oil objective lens.

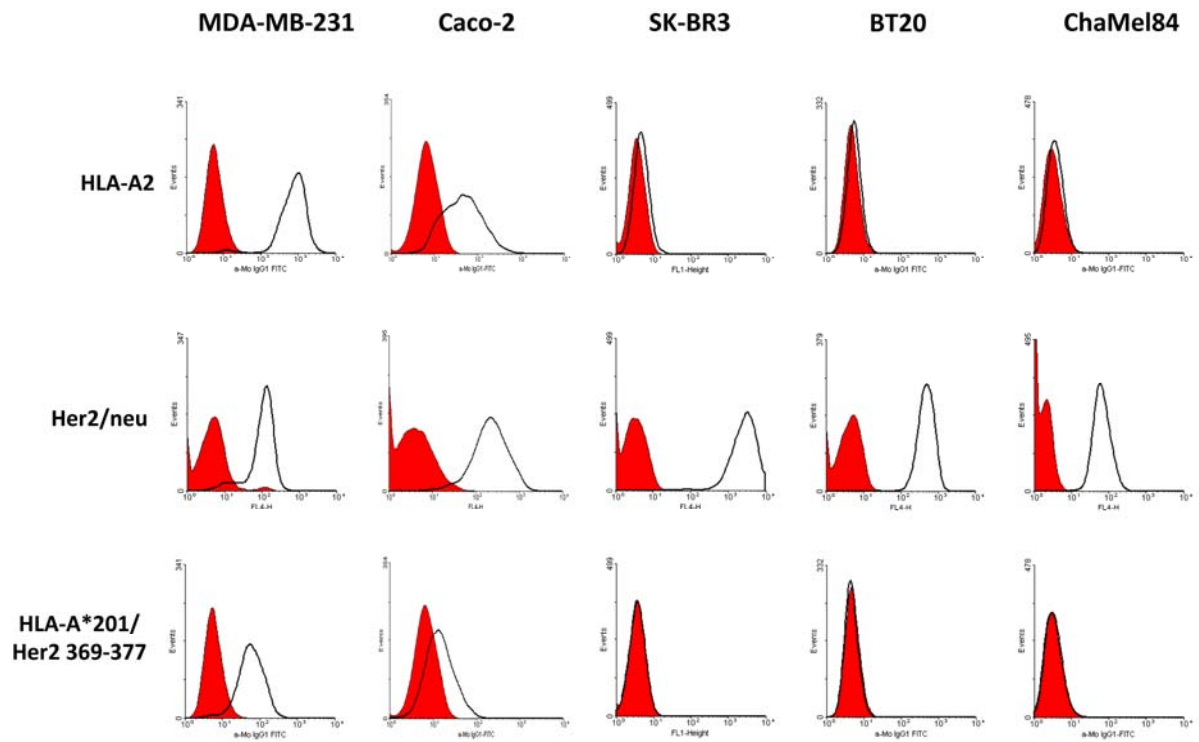

### Supplementary Figure 3

#### Specificity of the antibody RL1S for the complex HLA-A\*0201/HER2/neu<sub>369-377</sub>.

Tumor cells lines were checked for their expression of HLA-A2 (upper row), HER2/neu (intermediate row) and the complex HLA-A\*201/HER2/neu<sub>369-377</sub> (lower row). Only tumor cell lines expressing both HER2/neu and HLA-A2 stained positive for the complex HLA-A\*201/HER2/neu<sub>369-377</sub>. Red-filled histogram= unstained cells; Empty histogram= cells stained with the indicated antibody.

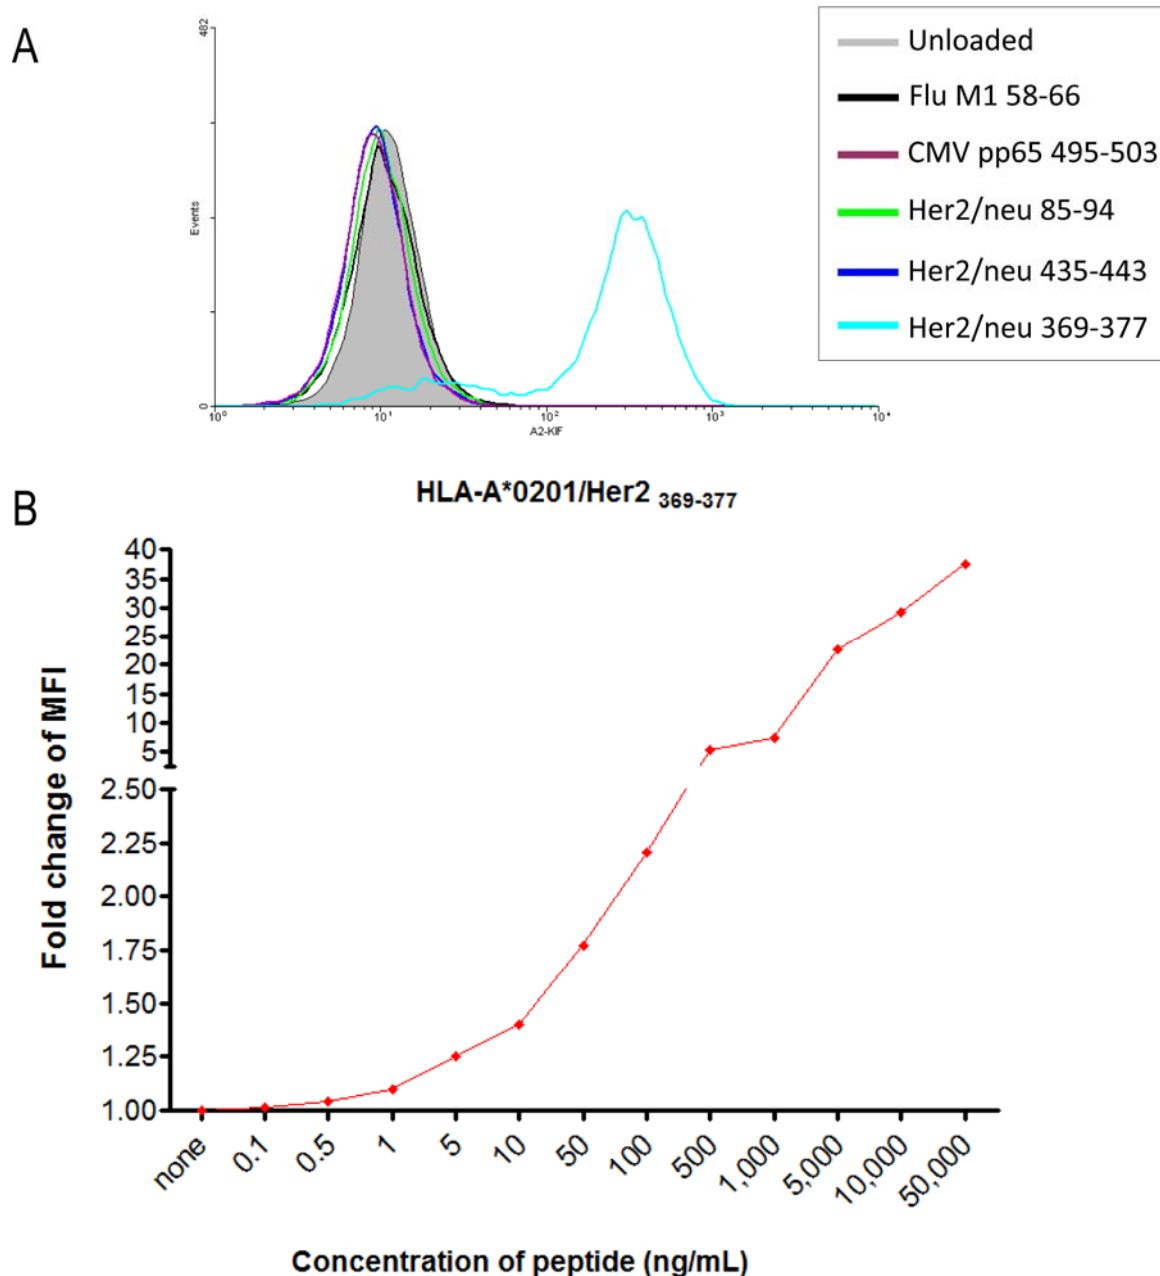

#### Supplementary Figure 4

##### Specificity and sensitivity of the antibody RL1S for the complex HLA-A\*0201/HER2/neu<sub>369-377</sub>.

(A) TAP-deficient T2 cells were pulsed for 4 hours with the following HLA-A2-binding peptides at 50  $\mu\text{g}/\text{mL}$ : Flu M1<sub>58-66</sub>, CMV pp65<sub>495-503</sub>, HER2/neu<sub>85-94</sub>, HER2/neu<sub>435-443</sub> and HER2/neu<sub>369-377</sub>, or left untreated (unloaded). Then, the cells were labeled with the mouse IgG1 antibody with specificity for the complex HLA-A\*0201/HER2/neu<sub>369-377</sub> (clone RL1S), followed by a FITC-labeled goat anti-mouse IgG1, as secondary antibody, and analyzed by flow cytometry. The cells pulsed with peptides other than HER2/neu<sub>369-377</sub> display fluorescence intensity similar to the untreated cells, whereas the cells pulsed with HER2/neu<sub>369-377</sub> display higher fluorescence (blue line), which shows its specificity for the complex HLA-A\*0201/HER2/neu<sub>369-377</sub>. (B) T2 cells were pulsed for 4 hours with titrated doses of the peptide HER2/neu<sub>369-377</sub>. Then cells were labeled with anti-HLA-A\*201/HER2/neu<sub>369-377</sub> and analyzed by flow cytometry as described for (A).

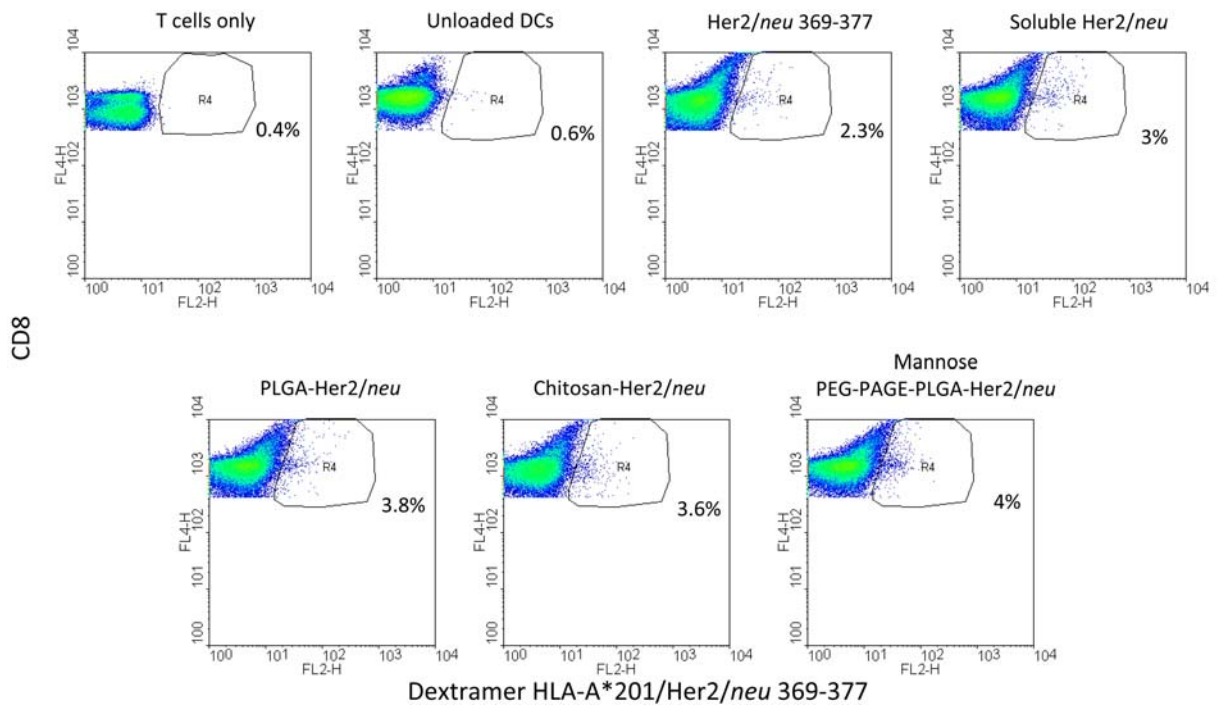

### Supplementary Figure 5

#### Immunostimulatory capacity of DCs loaded with HER2/neu in different formulations.

iDCs were incubated for 24 h with soluble HER2/neu (50  $\mu\text{g}/\text{mL}$ ) or NP-HER2/neu (5  $\mu\text{g}/\text{mL}$ ). Soluble HER2/neu<sub>369-377</sub> peptide (50  $\mu\text{g}/\text{mL}$ ) was incubated for 2 h. After incubation, DCs were washed and co-cultured with autologous CD8<sup>+</sup> T cells. Seven days later, CD8<sup>+</sup> T-cell expansion was evaluated by specific HLA-A\*201/HER2/neu<sub>369-377</sub> dextramer staining. Data are representative of 6 independent experiments performed with cells from 6 different donors.

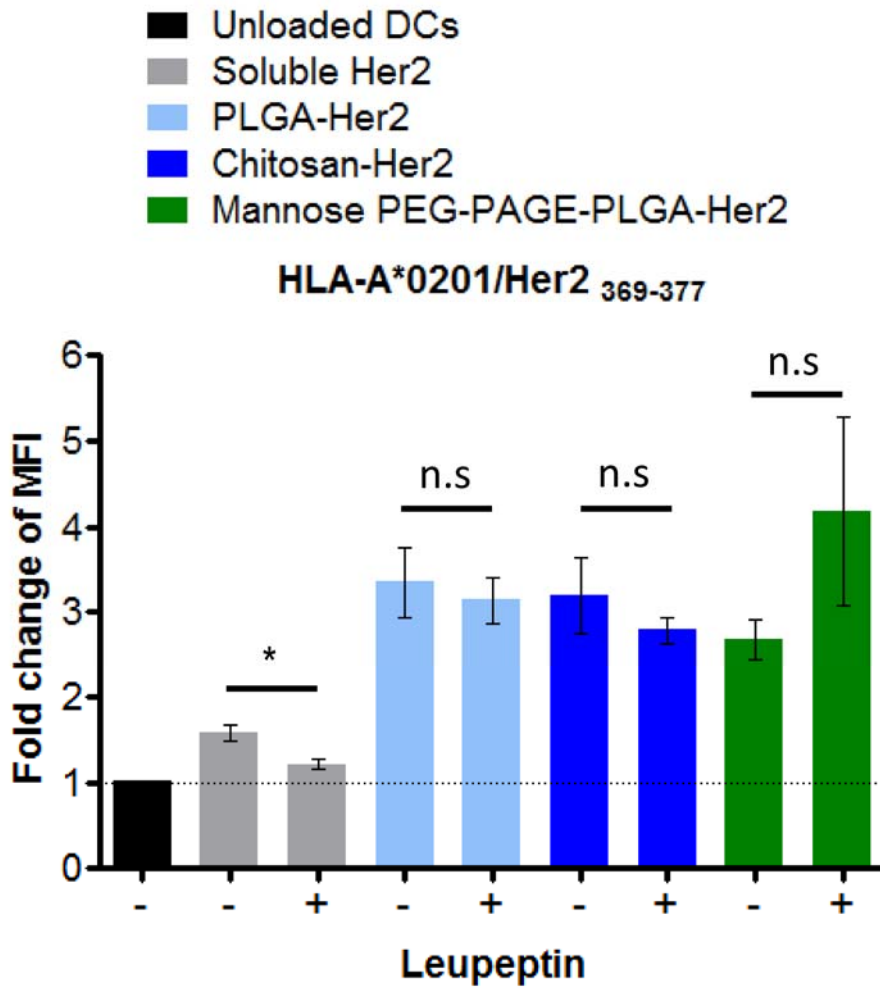

**Supplementary Figure 6**

**Effect of leupeptin on the cross-presentation of HER2/*neu*<sub>369-377</sub>.**

iDCs were incubated for 24 h with 5 µg/mL of HER2/*neu* in the soluble form or encapsulated in NPs. After incubation, cells were harvested and stained for the complexes HLA-A2/HER2/*neu*<sub>369-377</sub> and analyzed by Flow Cytometry. To investigate the endosomal processing leading to the cross-presentation, cells were treated with the serine and cysteine protease inhibitor leupeptin at 100 µM 30 min prior to adding the Ag. n= 3; Error bars= Standard error of the mean; n.s nonsignificant, \*p<0.05 in student's t-test.

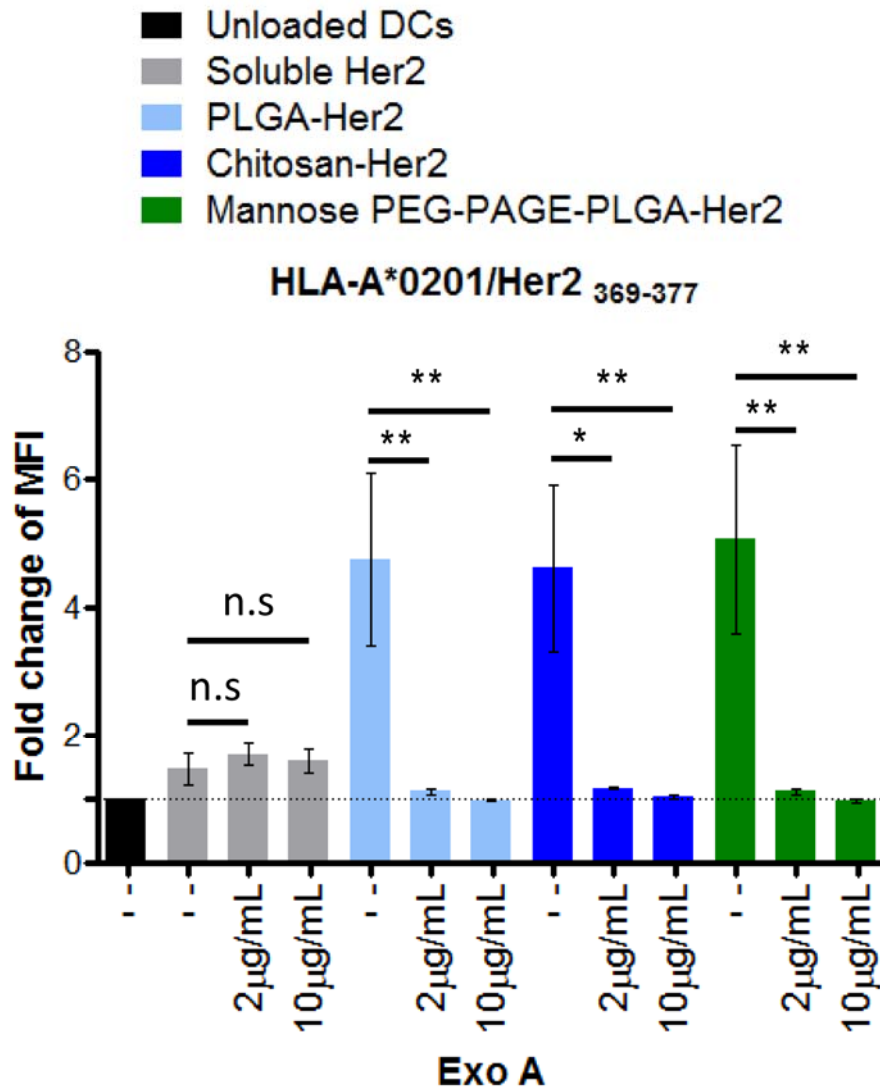

**Supplementary Figure 7**

**Effect of Exo A on the cross-presentation of HER2/*neu*<sub>369-377</sub>.**

iDCs were incubated for 24 h with 5 µg/mL of HER2/*neu* in the soluble form or encapsulated in NPs. After incubation, cells were harvested and stained for the complexes HLA-A2/HER2/*neu*<sub>369-377</sub> and analyzed by Flow Cytometry. To investigate the importance of Sec61 for the cross-presentation, cells were treated with *Pseudomonas aeruginosa* exotoxin A (Exo A), a Sec61 inhibitor at the indicated concentrations 30 min prior to adding the Ag. n= 4; Error bars= Standard error of the mean; n.s nonsignificant, \*p<0.05, \*\*p<0.01 in student's t-test.



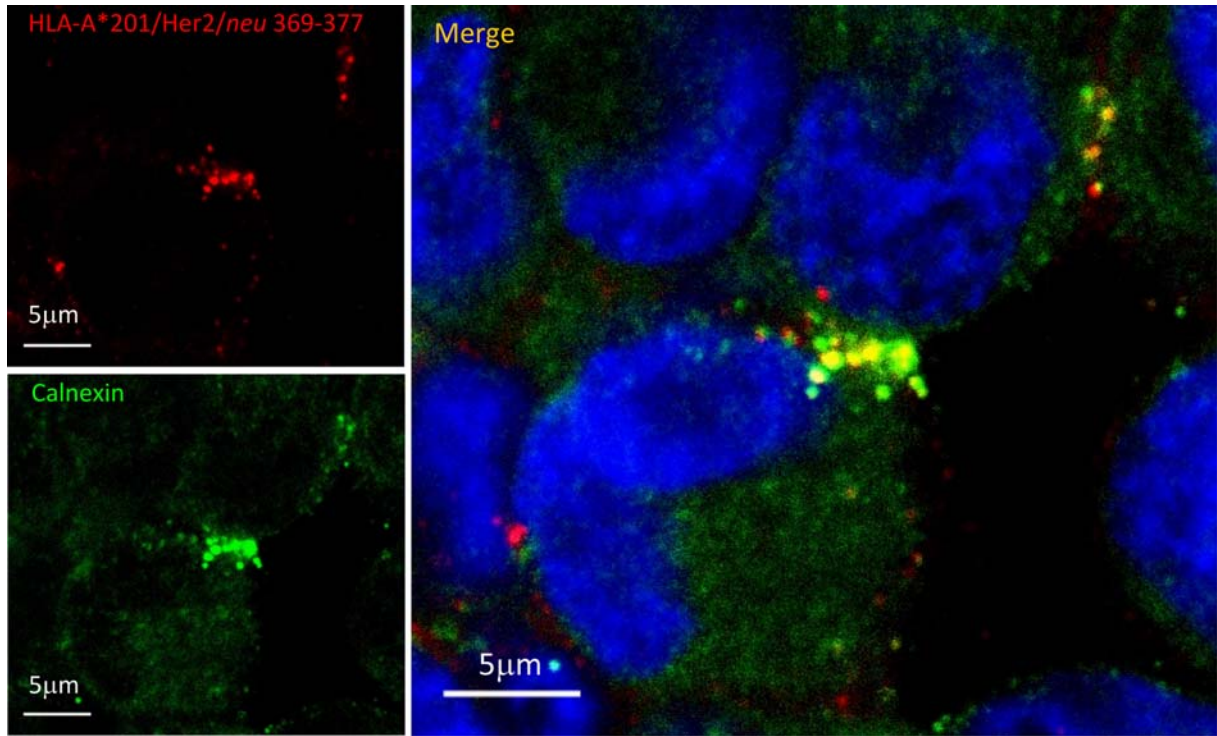

### Supplementary Figure 8

#### Intracellular expression of the complex HLA-A\*201/HER2/*neu*<sub>369-377</sub> by the cell line MDA-MB-231.

To identify the intracellular localization of the complex HLA-A\*201/HER2/*neu*<sub>369-377</sub> in a cell line that expresses the protein HER2/*neu* and is HLA-A2+, MDA-MB-231 cells were stained with antibody for HLA-A2/HER2/*neu*<sub>369-377</sub> and an antibody for calnexin, a protein expressed in the ER. Cells were counterstained with DAPI for nuclei visualization and examined by confocal microscopy.

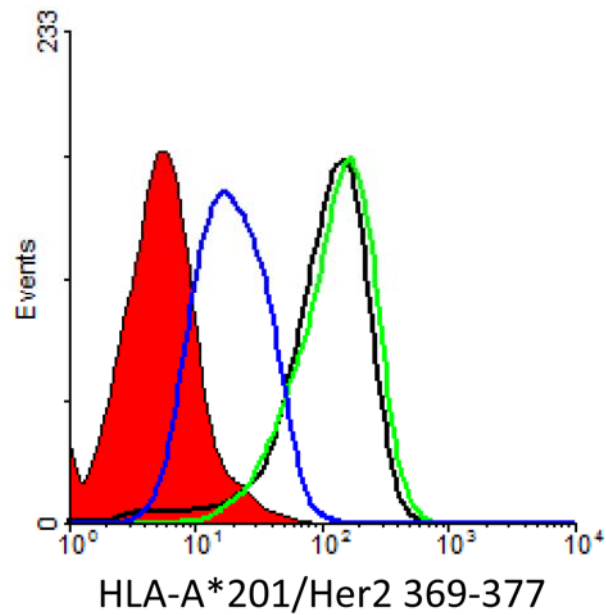

### Supplementary Figure 9

#### Effect of Brefeldin A and primaquine on the endogenous presentation of HER2/*neu*<sub>369-377</sub> by MDA-MB-231 cells.

To investigate the importance of the secretory pathway via ER-Golgi and endosomal transport for the endogenous presentation of the epitope HER2/*neu*<sub>369-377</sub> on HLA-A2, MDA-MB-231 cells were left untreated (black line), or incubated for 24h with Brefeldin A at 1  $\mu$ g/mL (blue line) or primaquine at 100  $\mu$ M (green line). After incubation, cells were harvested and surface stained for the complexes HLA-A2/HER2/*neu*<sub>369-377</sub> and analyzed by Flow Cytometry. Red-filled histogram= unstained cells.

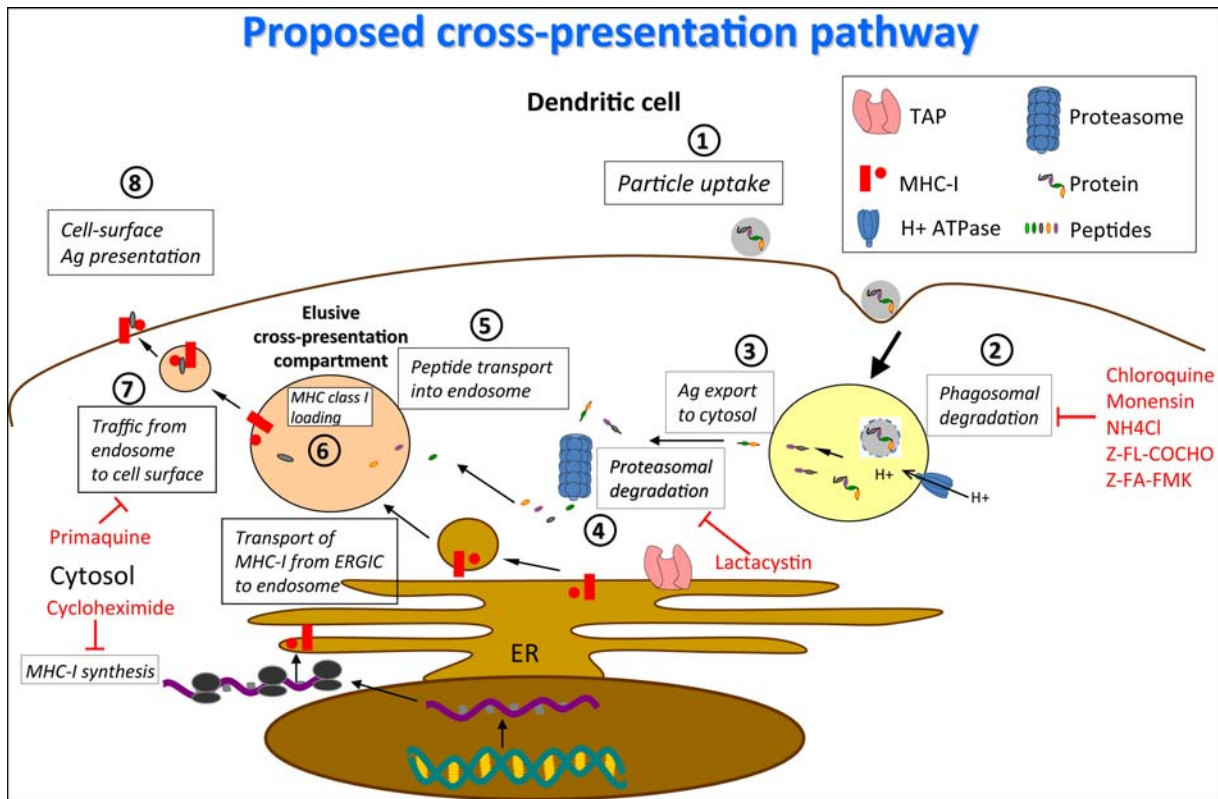

**Supplementary Figure 10**

**Proposed cross-presentation pathway for HER2/neu delivered to DCs in nanoparticles.**

The cartoon depicts the proposed cross-presentation pathway following uptake of particulate HER2/neu protein by human DCs. ER= Endoplasmic reticulum; ERGIC= Endoplasmic reticulum Golgi intermediate compartment; NH<sub>4</sub>Cl= Ammonium chloride; Z-FA-FMK= Z-Phe-Ala fluoromethyl ketone; Z-FL-COCHO= benzyl N-[1-[(5-methyl-1,2-dioxohexan-3-yl)amino]-1-oxo-3-phenylpropan-2-yl]carbamate; MHC= Major histocompatibility complex; TAP= Transporter associated with antigen processing.
